1 **Broad and potent neutralizing mAbs are elicited in vaccinated individuals following**  
2 **Delta/BA.1 breakthrough infection**

3

4 Jeffrey Seow<sup>1\*</sup>, Zayed A. Shalim<sup>1\*</sup>, Carl Graham<sup>1</sup>, Simon Kimuda<sup>1</sup>, Aswin Pillai<sup>1</sup>, Thomas  
5 Lechmere<sup>1</sup>, Ashwini Kurshan<sup>1</sup>, Atika M. Khimji<sup>1</sup>, Luke B. Snell<sup>1,2</sup>, Gaia Nebbia<sup>2</sup>, Christine  
6 Mant<sup>1,3</sup>, Anele Waters<sup>4</sup>, Julie Fox<sup>1,4</sup>, Michael H. Malim<sup>1</sup>, Katie J. Doores<sup>1#</sup>

7

8 <sup>1</sup>Department of Infectious Diseases, School of Immunology & Microbial Sciences, King's  
9 College London, London, UK.

10 <sup>2</sup>Centre for Clinical Infection and Diagnostics Research, Department of Infectious Diseases,  
11 Guy's and St Thomas' NHS Foundation Trust, London, UK.

12 <sup>3</sup>Infectious Diseases Biobank, Department of Infectious Diseases, School of Immunology  
13 and Microbial Sciences, King's College London, London, UK.

14 <sup>4</sup> Harrison Wing, Guys and St Thomas' NHS Trust, London, UK.

15

16 \* These authors contributed equally

17 # Corresponding author: [katie.doores@kcl.ac.uk](mailto:katie.doores@kcl.ac.uk)

18

19

20

21 **Abstract:**

22 Despite the success of COVID-19 vaccines in preventing infection and/or severe disease, with  
23 the emergence of SARS-CoV-2 variants of concern (VOC) which encode mutations in Spike,  
24 and the waning of vaccine induced immunity, there has been an increase in SARS-CoV-2  
25 infections in vaccinated individuals which leads to increased serum neutralization breadth.  
26 However, how exposure to a heterologous Spike broadens the neutralizing response at the  
27 monoclonal antibody (mAb) level is not fully understood. Through isolation of 119 mAbs from  
28 three individuals receiving two-doses of BNT162b2 vaccine before becoming delta or  
29 omicron/BA.1-infected, we show that breadth arises from re-activation and maturation of B  
30 cells generated through previous COVID-19 vaccination rather than a *de novo* response  
31 specific to the VOC Spike. Isolated mAbs frequently show reduced neutralization of current  
32 circulating variants including BA.2.75.2, XBB, XBB.1.5 and BQ.1.1 confirming continuous  
33 selective pressure on Spike to evolve and evade neutralization. However, isolation of mAbs  
34 that display effective cross-neutralization against all variants indicate the presence of  
35 conserved epitopes on RBD and a lesser extent NTD. These findings have implications for  
36 selection of Spike antigens for next-generation COVID-19 vaccines.

37

## 38 **Introduction:**

39 Both SARS-CoV-2 infection and COVID-19 vaccines based on the SARS-CoV-2  
40 surface glycoprotein, Spike, generate neutralizing antibodies in SARS-CoV-2 naïve  
41 individuals which can prevent infection and/or severe disease. Indeed, induction of  
42 neutralizing antibodies is a correlate of protection<sup>1-4</sup>. Through isolation of monoclonal  
43 antibodies (mAbs) from SARS-CoV-2 convalescent donors or COVID-19 vaccinees, we and  
44 others have identified several neutralizing epitopes on Spike<sup>5-12</sup>, including epitopes on the  
45 receptor binding domain (RBD), N-terminal domain (NTD), S1D domain of S1, and on S2.  
46 mAbs against many of these epitopes have been shown to protect from SARS-CoV-2 infection  
47 in animal challenge models<sup>13-15</sup>.

48 However, with the waning of vaccine induced immunity<sup>16,17</sup> and the emergence of  
49 SARS-CoV-2 variants of concern (VOC) which encode mutations in Spike<sup>18</sup>, there has been  
50 an increase in infections with VOCs in vaccinated individuals. We and others have previously  
51 shown that a breakthrough infection (BTI) with a VOC following vaccination can broaden the  
52 neutralization capacity of the polyclonal response in sera, and generate neutralizing activity  
53 against highly divergent SARS-CoV-2 viral variants carrying Spike mutations across multiple  
54 neutralizing epitopes<sup>19-23</sup>. Despite the increase in infections with new VOCs, vaccines based  
55 on the ancestral SARS-CoV-2 (Wuhan-1) have remained effective at reducing severe disease  
56 and hospitalizations<sup>24,25</sup>. For continued control of the SARS-CoV-2 pandemic, it is important  
57 to understand how infection with SARS-CoV-2 variants in vaccinated individuals shapes the  
58 antibody response against SARS-CoV-2 Spike and the resulting susceptibility to infection with  
59 newly arising VOCs. Further understanding in this area has direct application to selecting  
60 Spike antigens to be used in future generation COVID-19 vaccines.

61 In the context of influenza, secondary infection with an antigenically distinct influenza  
62 strain generates antibodies that are highly cross-reactive with the primary infecting virus  
63 (termed original antigenic sin or immune imprinting)<sup>26-28</sup>. This is thought to arise due to  
64 preferential induction of antibodies with higher affinity to the priming antigen than the boosting  
65 antigen. A third COVID-19 vaccine dose based on the Wuhan-1 Spike has also been shown

66 to increase neutralization breadth against VOCs, in particular against omicron/BA.1<sup>8,19,29,30</sup>.  
67 However, whether a SARS-CoV-2 variant infection in vaccinated individuals leads to a *de novo*  
68 response specific for the infecting VOC or whether pre-existing memory B cells are activated  
69 upon VOC exposure is not fully understood.

70 Here, we isolated mAbs from three individuals who had received two doses of the  
71 BNT162b2 vaccine and then experienced a delta or omicron/BA.1 infection to understand how  
72 neutralization breadth increases following BTI at the mAb level. We used antigen-specific B  
73 cell sorting with an S1 probe matching the vaccine and infecting variant to isolate 119 mAbs.  
74 We show that all isolated mAbs can bind and neutralize vaccine and infection strains, with the  
75 majority of neutralizing mAbs targeting the RBD indicating re-activation and continued  
76 maturation of B cell clones generated through previous COVID-19 vaccination. Isolated mAbs  
77 showed strong cross-neutralization of omicron sub-lineages BA.1, BA.2 and BA.4/5 but the  
78 majority showed reduced neutralization against newer variants, including BA.2.75.2, XBB,  
79 XBB.1.5 and BQ.1.1. However, subsets of mAbs with broad cross-neutralization were  
80 identified highlighting the presence of conserved neutralizing epitopes across antigenically  
81 distant Spikes. These findings have implications for selecting Spike antigens for next  
82 generation COVID-19 vaccines.

83

## 84 **Results**

### 85 **Wuhan-1 and VOC S1 reactive B cells present at similar levels**

86 To gain insight into the neutralizing activity within polyclonal sera from BTI individuals,  
87 we used antigen-specific B cell sorting to isolate S1-reactive IgG<sup>+</sup> B cells from two Delta-  
88 infected individuals (VAIN1 and VAIN2) and one BA.1-infected individual (VAIN3) (see  
89 **Supplementary Figure 1** for full sorting strategy). All three donors had no history of SARS-  
90 CoV-2 infection and had received 2-doses of the BNT162b2 vaccine with an extended  
91 interval<sup>19</sup> prior to infection. Blood samples were collected 14, 87 and 26 days post infection,  
92 respectively (See **Supplementary Table 1** for full donor information). Cross-neutralizing  
93 activity was observed in sera collected at these time points (**Supplementary Figure 2**). To

94 allow for identification of variant specific mAb responses, we performed two sorts from each  
95 donor using different antigen-baits, one sort using the Wuhan-1 S1 (matched vaccine strain  
96 and referred to as wild-type, WT) and one sort using the VOC S1 (delta S1 for VAIN1 and  
97 VAIN2, and BA.1 S1 for VAIN3) (**Figure 1A**). Similar levels of WT and VOC reactive IgG<sup>+</sup> B  
98 cells were observed for all three donors (**Figure 1B**).

99 mAb heavy and light chain genes were rescued using reverse transcription and nested  
100 PCR using gene-specific primers<sup>31,32</sup>. The variable regions were then cloned into IgG1  
101 expression vectors using Gibson assembly and directly transfected in the HEK293T/17 cells<sup>5,6</sup>.  
102 Crude supernatants were tested by ELISA and the heavy and light chain genes of Spike  
103 reactive IgGs were sequenced. In total, 46, 43 and 30 spike-reactive mAbs were isolated from  
104 VAIN1, VAIN2 and VAIN3, respectively (**Figure 1C**).

105

#### 106 **Delta and BA.1 BTI generates neutralizing mAbs against RBD and NTD**

107 ELISA with the crude supernatants were used to determine the VOC specificity and  
108 the specific domains targeted by each mAb. Despite different antigen-baits being used for B  
109 cell selection, all mAbs isolated showed reactivity to both the WT and VOC Spikes, consistent  
110 with reactivation of B cells generated from prior vaccination (**Figure 1C**). Similar to previous  
111 observations<sup>5,6</sup>, 72.1-83.3% of mAbs were RBD specific (**Figure 1D**) with the remaining mAbs  
112 specific for NTD.

113 Neutralization activity of concentrated supernatant was determined using HIV-1 virus  
114 particles, pseudotyped with SARS-CoV-2 Wuhan-1 (wild-type, WT) Spike<sup>33</sup>. As previously  
115 observed, the majority (93.5 %) of RBD-specific mAbs had neutralizing activity (**Figure 1D**)  
116 whereas only 53.8 % of NTD mAbs showed neutralizing activity against WT pseudotyped  
117 virus.

118

#### 119 **Mutation and germline gene usage**

120 The level of somatic hypermutation and germline gene usage was determined using  
121 the IMGT database<sup>34</sup>. The mean divergence from germline at the nucleotide level for the

122 variable heavy ( $V_H$ ) and light ( $V_L$ ) regions was 5.0% and 3.9%, respectively (**Figure 2A**).  
123 Comparison of mutation levels between the three donors showed that VAIN3 (BA.1-infected)  
124 had higher mutation than VAIN1 and VAIN2 in the  $V_H$  and  $V_L$  region (**Supplementary Figure**  
125 **3A**). mAbs selected using the BA.1 S1 probe were more mutated than delta or WT S1 selected  
126 B cells (**Supplementary Figure 3B**). However, this might be donor specific observation as  
127 there was no difference in the level of mutation in  $V_H$  between WT S1 and VOC S1 selected  
128 B cells from each donor (**Supplementary Figure 3C**).

129 The degree of divergence from germline was also compared to a database of SARS-  
130 CoV-2 specific mAbs isolated from convalescent donors and individuals that had received 2  
131 or 3 doses of COVID-19 vaccine<sup>35</sup>, as well as paired heavy and light chains of IgG B cell  
132 receptors from CD19+ B cells of healthy individuals<sup>36</sup> (**Figure 2B and 2C**). Since the SARS-  
133 CoV-2 mAb database only included amino acid sequences for some mAbs, divergence from  
134 germline was determined at the amino acid level (which was previously shown to correlate  
135 well with nucleotide divergence<sup>6</sup>). BTI mAbs had a statistically higher amino acid mutation  
136 level ( $V_H$  9.2% and  $V_L$  6.2%) compared to mAbs isolated following infection only ( $V_H$  4.2% and  
137  $V_L$  3.0%) and following two vaccine doses ( $V_H$  5.3% and  $V_L$  3.2%). However, there was no  
138 statistical difference in mutations levels between BTI mAbs and mAbs isolated following 3  
139 vaccine doses ( $V_H$  8.2% and  $V_L$  5.6%) indicating an additional exposure to SARS-CoV-2 Spike  
140 in the form of infection or vaccination leads to increased somatic hypermutation. Non-Spike  
141 specific B cells were more highly mutated than BTI mAbs ( $V_H$  10.9% and  $V_L$  7.5%).  
142 Comparison of the CDRH3 length distribution with representative naive repertoires<sup>37</sup> showed  
143 an enrichment in CDRH3 of lengths 20 amino acids (**Supplementary Figure 3D**) which is  
144 predominantly driven by a clonal expansion of a VH3-30 germline family from VAIN2  
145 (**Supplementary Table 2**).

146 Sequence analysis identified clonally related sequences within all three donors (**Figure**  
147 **2D and Supplementary Table 2**). Clonally expanded B cells represented 4%, 21% and 40%  
148 of all B cells from VAIN1, VAIN2 and VAIN3, respectively. Germline usage of BTI mAbs was  
149 also compared with non-Spike reactive mAbs and vaccine derived mAbs (**Figure 2E and 2F**).

150 As previously observed, there was an enrichment in VH3-53 and VH3-30/VH3-30-3 germline  
151 usage (**Figure 2E**)<sup>5,38-41</sup>. mAbs utilizing these VH3-53 typically target the ACE2-binding site  
152 on RBD<sup>5,38-41</sup>. VH3-30/VH3-30-3 encoded 20 RBD-specific mAbs with neutralizing activity  
153 (**Supplementary Table 3**). Enrichment in VH5-51 was seen for BTI mAbs compared to non-  
154 Spike mAbs from naïve donors but this was not seen for vaccine-derived mAbs. When  
155 comparing between vaccine-derived mAbs and BTI mAbs, enrichments in VH3-9, VH3-66 and  
156 VH3-13 were seen for vaccine-derived mAbs but not for BTI mAbs. When considering the light  
157 chain, enrichment in gene usage was seen for VK1-39 (22/119), VK1-5 (12/119) and VK1-33  
158 (18/119) and enrichment of these germlines was greater than observed for vaccine-derived  
159 mAbs. Overall, there continues to be a diverse repertoire of SARS-CoV-2 specific mAbs  
160 present following infection in vaccinated individuals.

161

#### 162 **mAbs isolated following BTI have broad neutralization against omicron sub-lineages**

163 A selection of 67 neutralizing antibodies from the three donors were expressed and  
164 purified on a large scale for further characterization of neutralization breadth, potency and  
165 epitope specificity. Neutralization of purified mAbs was measured against a panel of viral  
166 particles pseudotyped with different SARS-CoV-2 variant Spikes, including WT, Delta, Beta,  
167 BA.1, BA.2 and BA.4/5 (**Supplementary Table 4**). mAbs with potent activity against all six  
168 viruses tested were identified in all three donors (**Figure 3A**). The neutralization potency of  
169 mAbs against WT and BTI variant correlated well for both delta BTI and BA.1 BTI mAbs  
170 (**Supplementary Figure 4**). When considering the geometric mean IC<sub>50</sub> for mAbs isolated  
171 following VAIN1 and VAIN2 (delta infection) and VAIN3 (BA.1 infection), a different pattern of  
172 potencies was observed (**Figure 3A**). Whereas WT and delta were most potently neutralized  
173 by mAbs from the delta-infected donors, BA.1 and beta were most potently neutralized by  
174 mAbs from the BA.1-infected donor. BA.1 and beta share common mutations in RBD (K417N,  
175 E484K, N501Y) which could explain the high level of cross-reactivity of mAbs from VAIN3 with  
176 the beta variant.

177           The neutralization breadth of mAbs isolated following BTI was compared to that of  
178 mAbs isolated from convalescent donors early in the pandemic (March – May 2020)<sup>5</sup> and an  
179 mAbs isolated following 2-doses of AZD1222<sup>6</sup>. Analysis was focused on omicron sub-lineages  
180 BA.1, BA.2 and BA.4/5 (**Figure 3B**). The geometric mean IC<sub>50</sub>s against WT pseudotyped virus  
181 were most similar between the three mAb groups, whereas neutralization of the omicron sub-  
182 lineages showed larger differences. The lowest neutralization potencies were observed by  
183 infection and vaccine mAbs against BA.1, BA.2 and BA.4/5. mAbs isolated following delta BTI  
184 had similar GMT against BA.1, BA.2 and BA.4/5 whereas mAbs isolated following BA.1 BTI  
185 were more potent at neutralizing BA.1 compared to BA.2 and BA.4/5. The greater  
186 neutralization breadth of BTI mAbs is consistent with higher divergence from germline  
187 sequence.<sup>6,23,42-44</sup> Interestingly, some of the mAbs isolated from the convalescent and  
188 AZD1222 vaccinated donors showed potent cross neutralization against all omicron sub-  
189 lineages<sup>45</sup> despite having only experienced the WT Spike. Overall, mAbs with potent cross-  
190 neutralization were identified against antigenically omicron sub-lineages.

191

### 192 **RBD-specific mAbs form five competition groups**

193           To understand more about the epitopes targeting on RBD, we performed Spike  
194 competition ELISAs between neutralizing antibodies with known RBD specificity that had been  
195 isolated from convalescent or vaccinated donors<sup>5,6</sup> (**Figure 4A-C** and **Supplementary Figure**  
196 **5A**). Furthermore, to gain insight into mechanisms of neutralization, the ability of mAbs to  
197 inhibit binding of soluble Spike to HeLa-ACE2 cells was measured by flow cytometry<sup>5</sup> (**Figure**  
198 **4D**). mAbs with high inhibition levels directly block ACE2 binding through binding to the  
199 receptor binding motif (RBM)<sup>5,6</sup>. The RBD-specific mAbs formed five competition groups  
200 (**Supplementary Figure 5A**), four of which had been observed previously<sup>5,6</sup>. The distribution  
201 of RBD-specific mAbs between competition groups differed between the three donors, with  
202 VAIN1 and VAIN3 having the highest frequency of competition Group 4 and VAIN2 having the  
203 highest frequency of Group 3 (**Figure 4A**). Our previous studies isolating mAbs following  
204 infection<sup>5</sup> or vaccination<sup>6</sup> had shown a dominance of Group 3 and Group 4 RBD-specific



205 mAbs, respectively. Interpretation of the biological significance of the differences in epitope  
206 immunodominance is limited due to the small number of mAbs studied.

207 The majority of Group 1 mAbs, which bind an epitope distal to RBM (**Figure 4B and**  
208 **4C**), showed neutralization activity against WT, delta and beta VOCS, but had greatly reduced  
209 or limited neutralization activity against the omicron sub-lineages (**Figure 4E**). This was true  
210 for mAbs isolated following both delta and BA.1 BTI. Group 2 mAbs, characterized by their  
211 ability to compete with both Group 1 and Group 3 mAbs, showed strong ACE2 competition  
212 (**Figure 4D**) as well as cross-neutralization of VOCs.

213 Group 3 mAbs were enriched with VH3-53/3-66 germline usage (11/18)  
214 (**Supplementary Table 3**) which have been shown to bind the ACE2 receptor binding motif  
215 (RBM) on RBD<sup>39-41</sup>. Indeed, the majority of Group 3 mAbs showed >90% inhibition of ACE2  
216 binding (**Figure 4D**). Interestingly, several mAbs that competed strongly with Group 3 mAbs  
217 showed very little inhibition of ACE2 binding suggesting a wide Spike footprint for this  
218 competition group and differing angles of approach. VH3-53/3-66 using mAbs showed broad  
219 and potent neutralization of omicron sub-lineages reaching  $IC_{50} < 0.001 \mu\text{g/mL}$  (**Figure 4E**).  
220 However, Group 3 VH3-30 using mAbs isolated following delta BTI had limited neutralization  
221 breadth and only neutralized WT and delta VOCs (**Supplementary Table 3**).

222 mAbs within Group 4 competed with mAbs known to bind distal to the RBM and able  
223 to bind the RBD in its closed conformation (**Figure 4B**). These mAbs showed broad cross-  
224 neutralization across VOCs (**Figure 4E**) but the overall neutralization potency was reduced  
225 against WT and delta compared to the Group 3 mAbs with  $IC_{50}$  in the 0.001 – 8.65  $\mu\text{g/mL}$   
226 (geometric mean 0.11  $\mu\text{g/mL}$ ) and 0.0001 – 12.0  $\mu\text{g/mL}$  (geometric mean 0.11  $\mu\text{g/mL}$ ) range  
227 for WT and delta, respectively (**Supplementary Figure 6**). There was an enrichment in VH5-  
228 51 germline gene usage (6/24) (**Supplementary Table 3**). A range of ACE2 inhibitions were  
229 observed, indicating the large epitope footprint of this competition group (**Figure 4D**). An  
230 additional competition group (Group 3.5) was identified compared to our previous studies.  
231 Group 3.5 mAbs competed with both Group 3 and Group 4 mAbs (**Figure 4C**) and whilst

232 potently neutralizing WT and delta, showed limited neutralization of omicron sub-lineages, in  
233 particular BA.4 (**Figure 4E**).

234 To determine whether the epitopes of the RBD-specific mAbs isolated following BTI  
235 are conserved on other betacoronaviruses, we next measured neutralization activity against  
236 SARS-CoV-1 pseudotyped virus (**Figure 4F**). Cross-neutralization of SARS-CoV-1 was  
237 observed for mAbs belonging to all five RBD competition groups, with a particular abundance  
238 within competition Group 4 (11/23). Group 2 mAb VAIN3O\_12, isolated following BA.1 BTI  
239 was most potent, neutralizing SARS-CoV-1 with an IC<sub>50</sub> of 0.0039 µg/mL.

240 Overall, RBD mAbs competed with previously isolated RBD-specific mAbs suggesting  
241 new RBD epitopes are not being targeted. However, the increased cross-competition between  
242 competition groups suggests a larger collective RBD footprint for neutralizing antibodies.  
243 Further structural characterisation is required to understand how VOC BTI influences  
244 specificity of RBD mAbs at the molecular level.

245

#### 246 **Binding of NTD mAbs to VOCs does not correlate with neutralization activity**

247 Competition for Spike binding between NTD-specific neutralizing antibodies with  
248 known specificity was used to determine the epitopes targeted by the seven NTD-specific  
249 neutralizing antibodies isolated<sup>5</sup>. We have previously identified three NTD-specific mAb  
250 competition groups<sup>5,6</sup> and structural characterization of mAb P008\_56 from Group 6 revealed  
251 binding to NTD adjacent to the β-sandwich fold<sup>46</sup>. The NTD-specific mAbs isolated following  
252 BTI formed three competition groups (**Supplementary Figure 5B**). Groups 5 and 6 were  
253 identified previously, but an additional group that did not compete with previously isolated NTD  
254 mAbs was also identified (designated NTD unknown). Group 5 mAbs VAIN2D\_36 and  
255 VAIN2D\_16 had poor cross-neutralization of VOCs (**Figure 5A**) and despite being isolated  
256 from a delta-infected donor, were unable to neutralize delta. Both Group 5 mAbs utilised the  
257 VH4-34 germline but were not clonally related. Whilst Group 6 mAbs showed greater cross-  
258 neutralization compared to Group 5 mAbs, none were able to neutralize all six VOCs (**Figure**  
259 **5A**) but they were able to neutralize the variant the donor was infected with. The most broad

260 and potent Group 6 mAb was VAIN1D\_06 which neutralized all VOCs with  $IC_{50} < 0.55 \mu\text{g/mL}$   
261 except BA.1. mAb VAIN1WT\_13 from the non-competing group (NTD unknown) neutralized  
262 all 6 variants with  $IC_{50}$  between 0.033 – 13.9  $\mu\text{g/mL}$  with the lowest neutralization potency  
263 against omicron sub-lineages.

264 To determine whether NTD mAbs lacking neutralization ability against a VOC was due  
265 to an inability to bind the NTD, ELISA assays were performed using recombinant Spike (WT,  
266 delta, beta, and BA.1) and recombinant NTD (WT, BA.1, BA.2 and BA.4) antigens (**Figure**  
267 **5B**). Whilst binding and neutralization were consistent for VAIN1D\_06 and VAIN1WT\_13,  
268 binding did not always lead to neutralization for other NTD-specific mAbs. For example, Group  
269 5 mAbs VAIN2D\_16 and VAIN2D\_36 bound well to recombinant beta Spike but did not  
270 neutralize beta pseudovirs. Furthermore, mAb VAIN1WT\_46 bound to BA.2 and BA.4 NTD  
271 but did not neutralize the corresponding viral particles. This disconnect between NTD binding  
272 and neutralization was also observed by Wang *et al.*<sup>47</sup> Mechanisms of NTD-specific mAb  
273 neutralization are not fully understood. However, the high mutation level in this region  
274 suggests NTD is under strong selective pressure from the host's humoral immune response.  
275 McCallum *et al* demonstrate that some mAbs targeting the NTD supersite prevent SARS-CoV-  
276 2 Spike mediated cell-cell fusion,<sup>13</sup> whilst Cerutti *et al* showed that NTD mAbs use a restricted  
277 angle of approach to facilitate neutralization<sup>48</sup>. It is possible that the mutations, and/or  
278 insertions and deletions, within NTD encoded by different VOCs may alter the angle of  
279 approach which in turn reduces neutralization capability. Whether cross-binding but non-  
280 neutralizing NTD-specific mAbs can facilitate effector functions through their Fc receptors  
281 needs to be investigated further<sup>49,50</sup>.

282

### 283 **XBB, XBB.1.5, BA.2.75.2 and BQ.1.1 show greater antigenic divergence**

284 SARS-CoV-2 Spike continues to acquire mutations and since the omicron waves  
285 (including BA.1, BA.2, BA.4 and BA.5) new VOCs that have emerged include BA.2.75.2  
286 (evolved from BA.2), XBB and XBB.1.5 (a recombinant of two BA.2 lineages, BA.2.75 and

287 BJ.1) and BQ.1.1 (evolved from BA.5) (**Supplementary Table 4**). Despite these variants  
288 being on divergent evolutionary courses, they share convergent mutations in RBD. Additional  
289 mutations in RBD compared to BA.1 include R326T and N460K in BA.2.75.2, XBB/XBB.1.5  
290 and BQ.1.1, G446S and F486S in BA.2.75.2 and XBB/XBB.1.5, and K444T in BQ.1.1. A panel  
291 of mAbs were selected, based on their neutralization activity against omicron sub-lineages, to  
292 gain insight into whether BTI after two vaccine doses could elicit antibodies capable of  
293 neutralizing these new variants (**Figure 6B-C**). Neutralization potencies were compared to the  
294 neutralization activity in sera from the three donors (**Supplementary Figure 7**) as well as with  
295 a larger group of double vaccinated individuals experiencing a delta BTI (**Figure 6A**).

296         Whereas the sera from donors VAIN1, VAIN2 and VAIN3 had shown broad cross-  
297 neutralization of omicron sub-lineages (**Supplementary Figure 2**), there was a reduction in  
298 neutralization of BA.2.75.2, XBB, XBB.1.5 and BQ.1.1 (**Supplementary Figure 7**). This  
299 pattern of neutralization was observed in the larger panel of sera tested (**Figure 6A**) as well  
300 as by the isolated mAbs (**Figure 6B and 6C**). Whilst many of the BTI mAbs had retained some  
301 level of neutralization activity against the omicron sub-lineages, many of the mAbs tested lost  
302 neutralization activity against all four VOCs. However, RBD-specific mAbs with cross-  
303 neutralizing activity against all variants were still identified and importantly these belonged to  
304 multiple RBD competition groups (including Group 2, Group 3 and Group 4) (**Figure 6D**)  
305 indicating that the additional Spike mutations did not lead to complete disruption of all RBD  
306 neutralizing epitopes. Group 3 mAbs, VAIN2D\_12 and VAIN2D\_17, were most potent,  
307 neutralizing all VOCs with  $IC_{50} < 0.01 \mu\text{g/mL}$  (**Supplementary Table 3**). Other cross-  
308 neutralizing RBD-specific antibodies were less potent, only reaching  $IC_{50}$ s between  $0.1 \mu\text{g/mL}$   
309 and  $10 \mu\text{g/mL}$ . Whether mAbs with cross-neutralizing activity could undergo further mutation  
310 to enhance neutralization potency would be of interest for optimization of mAbs for therapy  
311 against diverse VOCs.

312         Overall, despite broad neutralization of BA.1, BA.2 and BA.4, the convergent RBD  
313 mutations in BA.2.75.2, XBB/XBB.1.5 and BQ.1.1 lead to extensive immune evasion to mAbs

314 generated following delta and BA.1 BTI. Several potent cross-neutralizing mAbs were  
315 identified and additional structural studies would provide important insights into how these  
316 mAbs tolerate these additional RBD mutations.

317

## 318 **Discussion**

319 Studies conducted by us and others using convalescent sera or plasma have shown  
320 that a delta or BA.1 infection following COVID-19 vaccination can broaden the neutralization  
321 activity against omicron sub-lineages<sup>19,20,22,51,52</sup>. Through isolation of mAbs from BNT162b2  
322 double vaccinated individuals that were subsequently delta or BA.1-infected, we showed that  
323 this increase in neutralization breadth is due to the presence of mAbs with potent cross-  
324 neutralizing activity. Despite using antigen baits specific for the vaccine and the infecting  
325 variant, we observed similar levels of WT and VOC specific B cells, and did not identify mAbs  
326 that were specific for the infecting variant. Combined with the observation that BTI mAbs had  
327 a higher level of somatic hypermutation compared to vaccine and infection-only elicited mAbs,  
328 we infer that delta or BA.1 infection in vaccinated individuals predominantly resulted in re-  
329 activation and maturation of B cells generated through previous COVID-19 vaccination rather  
330 than a *de novo* response specific to the VOC Spike, consistent with several other recent  
331 studies on breakthrough infection<sup>23,53-55</sup>.

332 With the reactivation of existing B cells, it might be expected that immune imprinting  
333 from prior COVID-19 vaccinations based on Wuhan-1 might limit neutralization breadth of  
334 mAbs in a manner similar to that observed following influenza re-exposure<sup>26-28</sup>. However, the  
335 continued maturation upon re-activation of B cells leads to mAbs with increased neutralization  
336 breadth. This observation is supported by research showing that wider SARS-CoV-2  
337 neutralization breadth is associated with increased somatic hypermutation<sup>6,23,42-44</sup>. The three  
338 donors studied here had received two vaccine doses prior to infection with an antigenically  
339 distinct Spike (either delta or BA.1). A third vaccine dose based on the Wuhan-1 strain has  
340 also been shown to increase neutralization breadth within polyclonal sera/plasma<sup>19,56,57</sup> and  
341 mAbs isolated from such individuals also show continued maturation and increased

342 neutralization breadth and potency against VOCs, in particular BA.1<sup>29,30,58</sup>. Combined, these  
343 findings show that a third antigenic stimulation, independent of the Spike variant, can increase  
344 neutralization breadth. However, studies examining the impact of a fourth antigenic stimulation  
345 show a more modest increase in neutralization breadth and potency of isolated mAbs<sup>54</sup>.

346 This study has implications for variant based vaccine boosters. COVID-19 vaccine  
347 boosters are important for maintaining circulating levels of antibodies as well as providing  
348 broadened protection against newly emerging variants. Whilst the goal of variant based  
349 vaccine boosters is to match circulating strains dominant in the human population, these  
350 findings suggest that exposure to an antigenically distinct Spike (either delta or BA.1) can  
351 provide broad protection through generating mAbs with cross-neutralizing activity instead of  
352 eliciting a *de novo* response specific for the variant. Indeed, bivalent vaccine boosters based  
353 upon the BA.1 or BA.4/5 Spike antigens are now being used, and are effective at generating  
354 broad neutralization against omicron sub-lineages similar to monovalent boosters<sup>59,60</sup> and are  
355 effective at preventing severe disease following BA.4.6, BA.5, BQ.1, and BQ.1.1 infections<sup>61</sup>.

356 Many BTI mAbs could neutralize variants of concern which have diverged  
357 independently from the ancestral Wuhan-1 strain and previous studies using a variety of  
358 immune sera have highlighted their antigenic distance<sup>62,63</sup>. This cross-neutralization highlights  
359 that despite large variation in Spike, several conserved neutralizing epitopes exist on RBD,  
360 and to a lesser extent NTD. This is further exemplified by identification of RBD-specific mAbs  
361 from all five competition groups that have neutralization activity against SARS-CoV-1.  
362 Interestingly, mAbs isolated following BA.1 BTI had greater cross-neutralization of beta  
363 compared to mAbs isolated following delta infection. BA.1 and beta share common mutations  
364 in RBD (K417N, E484K, N501Y) and mAbs directed against these mutated epitopes could  
365 explain the high level of cross-reactivity of mAbs from VAIN3 with beta.

366 The numbers of mAbs isolated are too small to draw strong conclusions regarding  
367 differences in epitope immunodominance upon different variant exposure. However, it is clear  
368 that neutralization activity converges on similar Spike epitopes. Since the delta and BA.1  
369 infection waves, SARS-CoV-2 has continued to mutate. Many of the BTI mAbs isolated here

370 lost or had greatly reduced neutralization activity against currently circulating VOCs (i.e. early  
371 2023), including BA.2.75.2, XBB/XBB.1.5 and BQ.1.1. This pattern was also observed in  
372 sera/plasma from BTI individuals and has been reported by several other groups worldwide<sup>64</sup>  
373 <sup>67</sup>. This suggests that mAbs generated during the large delta and BA.1 infection waves  
374 between June 2021 to March 2022 may have acted as selective pressures in driving immune  
375 escape of these VOCs, in particular selecting mutations within RBD. Indeed, BA.2.75.2 was  
376 highly prevalent in India following a large delta wave<sup>68</sup>. BA.2.75.2, XBB/XBB.1.5 and BQ.1.1.  
377 converge in their RBD mutational profile. BA.2.75.2, XBB/XBB.1.5 and BQ.1.1. share common  
378 mutations including R346T (within the competition Group 4 epitope) and N460K (within the  
379 competition Group 1 epitope), and XBB and BA.2.75.2 also share G446S and F486S  
380 mutations (within competition Group 3 epitope). Wang *et al* demonstrated that introduction of  
381 R346T, K444T or N460K into BA.4/5 and R346T, V445P or N460K into BA.2 were responsible  
382 for reduction in neutralization by many RBD-specific mAbs<sup>64</sup>. However, the identification of  
383 mAbs belonging to several RBD competition groups that had neutralization activity against all  
384 VOCs tested suggests that multiple additional Spike mutations would be required across RBD  
385 to generate complete immune evasion of the antibody response following BTI. The mAb recall  
386 response was diverse in gene usage despite multiple clonal expansions being observed.  
387 Maintaining a diverse response would not only limit immune escape through selection of Spike  
388 mutations but may also represent a wide pool of B cells that could be re-activated by a diverse  
389 range of antigenically distinct Spike variants. Further studies characterizing the antibody-Spike  
390 interaction at the molecular level would provide information on how these mAbs retain cross-  
391 neutralizing activity despite high-levels of Spike mutations and may help to predict future Spike  
392 escape variants.

393 Encouragingly, RBD-specific mAbs with cross-neutralizing activity against the most  
394 recent VOCs (BA.2.75.2, XBB/XBB.1.5 and BQ.1.1) were found within four RBD competition  
395 groups. These less frequent mAbs represent potential candidates for the next generation of  
396 antibody-based therapeutics against SARS-CoV-2 and other betacoronaviruses. Although  
397 these mAbs represent a minor component of the mAb response, understanding how to

398 selectively boost these responses could aid in preparedness against new SARS-CoV-2  
399 variants as they arise. Overall, infection with a VOC following two COVID-19 vaccine doses  
400 shapes the antibody response by re-activating and maturing existing Spike specific B cells to  
401 produce mAbs with broad neutralization activity.

402

## 403 **Methods:**

### 404 **Ethics and samples**

405 This study used human samples collected with written consent as part of a study entitled  
406 “Antibody responses following COVID-19 vaccination”. Ethical approval was obtained from the  
407 King’s College London Infectious Diseases Biobank (IBD) (KDJF-110121) under the terms of  
408 the IDB’s ethics permission (REC reference: 19/SC/0232) granted by the South Central  
409 Hampshire B Research Ethics Committee in 2019, and London Bridge Research Ethics  
410 Committee (Reference: REC14/LO/1699). Collection of surplus serum samples at St Thomas  
411 Hospital, London, was approved by South Central-Hampshire B REC (20/SC/0310). SARS-  
412 CoV-2 cases were diagnosed by either reverse transcriptase PCR (RT-PCR) of respiratory  
413 samples at St Thomas’ Hospital, London, UK or by lateral flow testing. All participants were  
414 SARS-CoV-2 naïve prior to vaccination and infection. Participants VAIN1 and VAIN2 were  
415 infected during the UK Delta wave (11/8/21 and 23/8/21, respectively), and participant VAIN3  
416 was infected during the UK BA.1 wave (18/12/21). Viral sequencing was not performed on  
417 these samples.

418

### 419 **Antigen-specific B cell sorting.**

420 Fluorescence-activated cell sorting of cryopreserved PBMCs was performed on a BD  
421 FACS Melody as previously described<sup>5,6</sup>. Sorting baits with a Strep2A tag (SARS-CoV-2  
422 Wuhan S1, Delta S1 and BA.1 S1) was pre-complexed with the StrepTactin fluorophore at a  
423 1:1 molar ratio prior to addition to cells. PBMCs were stained with live/dead (fixable Aqua  
424 Dead, Thermofisher), anti-CD3-APC/Cy7 (Biolegend), anti-CD8-APC-Cy7 (Biolegend), anti-  
425 CD14-BV510 (Biolegend), anti-CD19-PerCP-Cy5.5 (Biolegend), anti-IgM-PE (Biolegend),



426 anti-IgD-Pacific Blue (Biolegend) and anti-IgG-PeCy7 (BD) and S1-StrepTactin XT DY-649  
427 (IBA life sciences, 2-1568-050) and S1-StrepTactin XT DY-488 (IBA life sciences, 2-1562-  
428 050). Live CD3<sup>+</sup>CD8<sup>-</sup>CD14<sup>-</sup>CD19<sup>+</sup>IgM<sup>-</sup>IgD<sup>-</sup>IgG<sup>+</sup>S1<sup>+</sup>S1<sup>+</sup> cells were sorted using a BD FACS  
429 Melody into individual wells containing RNase OUT (Invitrogen), First Strand SuperScript III  
430 buffer, DTT and H<sub>2</sub>O (Invitrogen) and RNA was converted into cDNA (SuperScript III Reverse  
431 Transcriptase, Invitrogen) using random hexamers (Bioline Reagents Ltd) following the  
432 manufacturer's protocol.

433

#### 434 **Full-length antibody cloning and expression.**

435 The human Ab variable regions of heavy and kappa/lambda chains were PCR  
436 amplified using previously described primers and PCR conditions<sup>31,32,69</sup>. PCR products were  
437 purified and cloned into human-IgG (Heavy, Kappa or Lambda) expression plasmids<sup>32</sup> using  
438 the Gibson Assembly Master Mix (NEB) following the manufacturer's protocol. Gibson  
439 assembly products were directly transfected into HEK-293T/17 cells and transformed under  
440 ampicillin selection. Ab supernatants were harvested 3 days after transfection and IgG  
441 expression and Spike-reactivity determined using ELISA. Ab variable regions of heavy-light  
442 chain pairs that generated Spike reactive IgG were sequenced by Sanger sequencing.

443 Antibody heavy and light plasmids were co-transfected at a 1:1 ratio into HEK-293F  
444 cells (Thermofisher) using PEI Max (1 mg/mL, Polysciences, Inc.) at a 3:1 ratio (PEI  
445 Max:DNA). Ab supernatants were harvested five days following transfection, filtered and  
446 purified using protein G affinity chromatography following the manufacturer's protocol (GE  
447 Healthcare).

448

#### 449 **Pseudovirus production**

450 HEK293T/17 cells were seeded the day prior on 10 cm dishes at a density of 7x10<sup>5</sup>  
451 cells/mL in DMEM with 10% FBS, 1% Pen-Strep. Cells were co-transfected using 90 µg PEI-  
452 Max (1 mg/mL, Polysciences) with 15 µg HIV-luciferase plasmid, 10 µg HIV 8.91 gag/pol  
453 plasmid<sup>70</sup> and 5 µg SARS-CoV-2 Spike protein plasmid. Transfected cells were incubated for

454 72 h at 37°C and virus was harvested, sterile filtered and stored at -80°C until required.

455 Mutations present in each variant Spike are shown in **Supplementary Table 4**.

456

#### 457 **Neutralization assays**

458 Serial dilutions of plasma or mAb in DMEM, supplemented with 10% fetal bovine  
459 serum (FBS) and 1% Pen/Strep, were incubated in a 96 well plate, with HIV-1 virus  
460 pseudotyped with SARS-CoV-2 wild-type or variant Spikes for 1 h at 37°C. HeLa cells stably  
461 expressing the human ACE2 receptor were then added at a density of  $4 \times 10^5$  cells/mL to all  
462 wells and incubated for 72 h at 37°C. Levels of infection was measured with the Bright-Glo  
463 luciferase kit (Promega) on a Victor X3 multilabel reader (Perkin Elmer). Duplicate  
464 measurements were used to calculate  $IC_{50}$  and  $ID_{50}$ .

465

#### 466 **ELISA (Spike, RBD, NTD, or S1).**

467 96-well plates (Corning, 3690) were coated with Spike, S1, NTD or RBD at 3  $\mu$ g/mL  
468 overnight at 4°C. The plates were washed (5 times with PBS/0.05% Tween-20, PBS-T),  
469 blocked with blocking buffer (5% skimmed milk in PBS-T) for 1 h at room temperature. Serial  
470 dilutions of mAb or supernatant in blocking buffer were added and incubated for 2 hr at room  
471 temperature. Plates were washed (5 times with PBS-T) and secondary antibody was added  
472 and incubated for 1 hr at room temperature. IgG was detected using Goat-anti-human-Fc-AP  
473 (alkaline phosphatase) (1:1,000) (Jackson: 109-055-098). Plates were washed (5 times with  
474 PBS-T) and developed with either AP substrate (Sigma) and read at 405 nm.

475

#### 476 **Competition ELISA**

477  $F(ab')_2$  of previously characterized mAbs were produced by IdeS digestion of IgG as  
478 described previously<sup>5</sup>. 96-well plates (Corning, 3690) were coated with WT Spike at 3  $\mu$ g/mL  
479 overnight at 4°C. Plates were washed and blocked as described above. Serial dilutions (5-  
480 fold) of  $F(ab')_2$ , starting at 100-fold molar excess of the  $EC_{80}$  of Spike binding were added to  
481 the plate and incubated for 1 h at room temperature. Plates were washed (5x with PBS-T) and

482 competing IgG was added at the EC<sub>80</sub> of Spike binding and incubated for 1 h at room  
483 temperature. Plates were washed (5x with PBS-T) and Goat-anti-human-Fc-AP (alkaline  
484 phosphatase) (1:1,000) (Jackson: 109-055-098) was added and incubated for 1 h at room  
485 temperature. The plates were washed a final time (5x with PBS-T) and the plate was allowed  
486 to develop by addition of AP substrate (Sigma). Optical density at 405 nm was measured in 5  
487 min intervals. Percentage competition was calculated using the equation below and  
488 competition group clusters were arranged by hand according to binding epitope.

$$489 \quad \% \text{ IgG competition} = 100 * \left( 1 - \frac{\text{OD}_{405} \text{ of } F(ab')_2 \text{ sample well} - \text{mean OD}_{405} \text{ of background}}{\text{OD}_{405} \text{ of IgG only well} - \text{mean OD}_{405} \text{ of background}} \right)$$

490

### 491 **ACE2 competition measured by flow cytometry**

492 Fluorescent probe was prepared by mixing 3.5 molar excess of Streptavidin-APC  
493 (ThermoFisher Scientific, S32362) with biotinylated SARS-CoV-2 spike and incubating for 1 h  
494 on ice. Purified mAb was mixed with APC conjugated Spike in a molar ratio of 4:1 in FACS  
495 buffer (2% FBS in PBS) on ice for 1h. HeLa-ACE2 cells were washed once with PBS and  
496 detached using 5 mM EDTA, PBS. Cells were washed and resuspended in FACS buffer before  
497 adding  $5 \times 10^5$  cells to each mAb-Spike complex. Cells were incubated on ice for 30 min. HeLa-  
498 ACE2 cells alone and with SARS-CoV-2 Spike only were used as background and positive  
499 controls, respectively. The geometric mean fluorescence of APC was measured from the gate  
500 of singlet cells. ACE2 binding inhibition was calculated with this equation:

$$501 \quad \% \text{ ACE2 binding inhibition} = 100 * \left( 1 - \frac{\text{sample geometric mean} - \text{background geometric mean}}{\text{positive control geometric mean} - \text{background geometric mean}} \right)$$

502

### 503 **Sequence analysis of Monoclonal antibodies**

504 Heavy and light chain sequences of SARS-CoV-2 specific mAbs were examined using  
505 IMGT/V-quest ([http://www.imgt.org/IMGT\\_vquest/vquest](http://www.imgt.org/IMGT_vquest/vquest)) to identify germline usage,  
506 percentage of SHM and CDR region lengths. 5 amino acids or 15 nucleotides were truncated  
507 from the start and end of the sequences to remove variation introduced from the use of a  
508 mixture of forward cloning primers. D'Agostino and Pearson tests were performed to

509 determine normality. Based on the result, a Kruskal-Wallis test with Dunn's multiple  
510 comparison post hoc test was performed. Two-sided binomial test was performed in excel.  
511 Significance defined as  $p < 0.0332$  (\*),  $0.0021$  (\*\*),  $0.0002$  (\*\*\*) and  $>0.0001$  (\*\*\*\*).

512

### 513 **Acknowledgements**

514 We thank Philip Brouwer, Marit van Gils and Rogier Sanders for the Spike protein  
515 construct, Peter Cherepanov for S1 proteins from VOCs, Wendy Barclay for providing the  
516 beta, delta, BA.1, BA.2, BA.4/5, BA.2.75.2, XBB, XBB.1.5 and BQ.1.1 Spike plasmids and  
517 James Voss and Deli Huang for providing the Hela-ACE2 cells.

518

### 519 **Funding**

520 This work was funded by; Huo Family Foundation Award to MHM and KJD, MRC  
521 Genotype-to-Phenotype UK National Virology Consortium ([MR/W005611/1] to MHM and  
522 KJD), Fondation Dormeur, Vaduz for funding equipment to KJD, Wellcome Trust Investigator  
523 Award [222433/Z/21/Z] to MHM, and Wellcome Trust Multi-User Equipment Grant  
524 [208354/Z/17/Z] to MHM and KJD. KJD is supported by the Medical Research Foundation  
525 Emerging Leaders Prize 2021. CG was supported by the MRC-KCL Doctoral Training  
526 Partnership in Biomedical Sciences [MR/N013700/1]. This work and the Infectious Diseases  
527 Biobank (CM) were supported by the Department of Health via a National Institute for Health  
528 Research comprehensive Biomedical Research Centre award to Guy's and St Thomas' NHS  
529 Foundation Trust in partnership with King's College London and King's College Hospital NHS  
530 Foundation Trust. This study is part of the EDCTP2 programme supported by the European  
531 Union (grant number RIA2020EF-3008 COVAB) (KJD, JF, MHM). The views and opinions of  
532 authors expressed herein do not necessarily state or reflect those of EDCTP. This project is  
533 supported by a joint initiative between the Botnar Research Centre for Child Health and the  
534 European & Developing Countries Clinical Trials Partnership (KJD and JF).

535

536

537 **Figures and legends:**

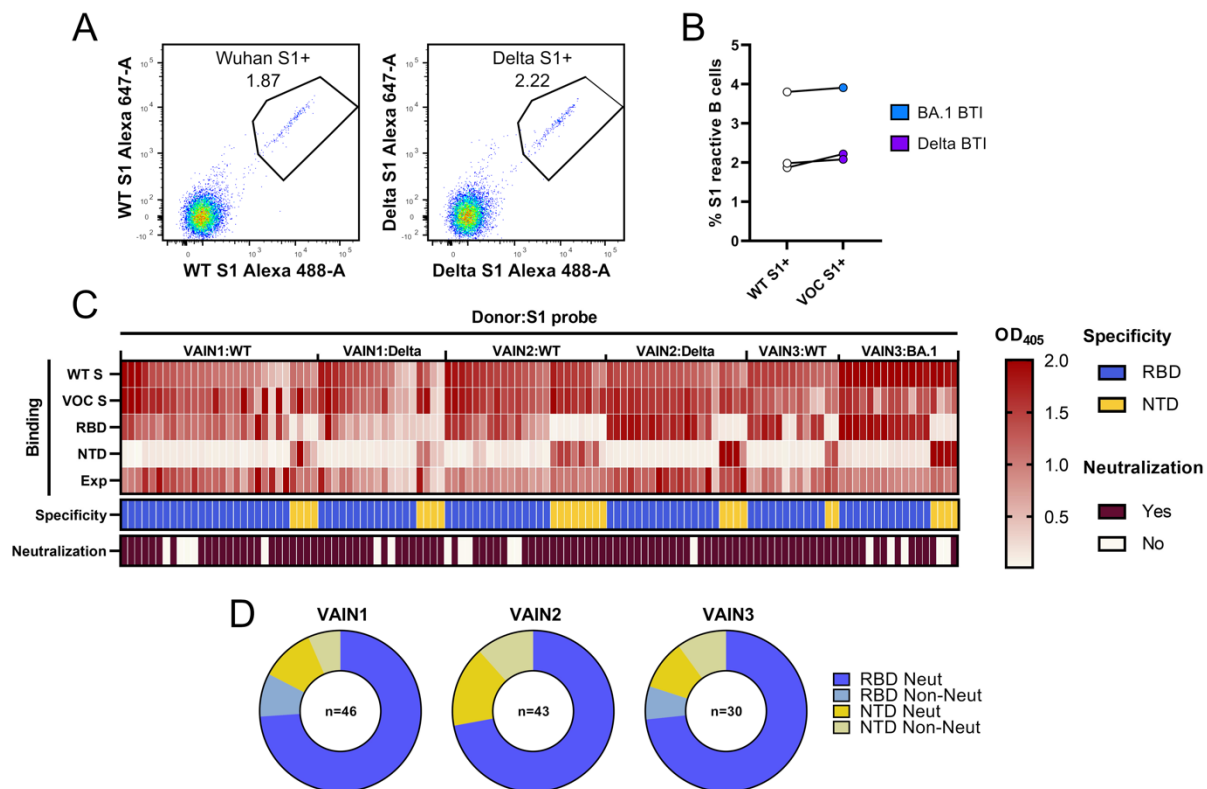

538

539 **Figure 1. Isolation of mAbs using antigen-specific B cell sorting. A)** CD14<sup>-</sup>/CD3<sup>-</sup>/CD8<sup>-</sup>  
 540 /CD19<sup>+</sup>/IgM<sup>-</sup>/IgD<sup>-</sup>/IgG<sup>+</sup> and S1<sup>+</sup> B cells were sorted into 96-well plates. Example fluorescent  
 541 activated cell sorting (FACS) showing percentage of CD19<sup>+</sup>IgG<sup>+</sup> B cells binding to S1 of  
 542 Wuhan-1 or S1 of delta VOC. Full sorting gating strategy is shown in **Supplementary Figure**  
 543 **1. B)** Percentage of CD19<sup>+</sup>IgG<sup>+</sup> S1 Wuhan and S1 VOC reactive B cells for each donor (delta  
 544 for VAIN1 and VAIN2, BA.1 for VAIN3). Data points from the same individuals are linked. Blue:  
 545 BA.1/Omicron infected, purple: delta-infected. **C)** Heatmap showing IgG expression level and  
 546 binding to SARS-CoV-2 Spike (WT and VOC (delta for VAIN1 and VAIN2, BA.1 for VAIN3),  
 547 and to Spike domains RBD and NTD. The figure reports OD values from a single experiment  
 548 (range 0–2.0) for undiluted supernatant from small-scale transfection of 119 cloned mAbs.  
 549 Antigen binding was considered positive when OD at 405 nm was >0.2 after subtraction of the  
 550 background. SARS-CoV-2 Spike domain specificity (RBD or NTD) for each antibody is  
 551 indicated. Neutralization activity was measured against wild-type (WT; Wuhan) pseudotyped  
 552 virus using concentrated supernatant and neutralization status is indicated. Antigen probe

553 used to select specific B cells is indicated (i.e. WT S1, delta S1 or BA.1 S1). **D**) Distribution of  
 554 mAbs targeting RBD and NTD for each donor, as well as their neutralization capability. mAbs  
 555 are classified as shown in the key.

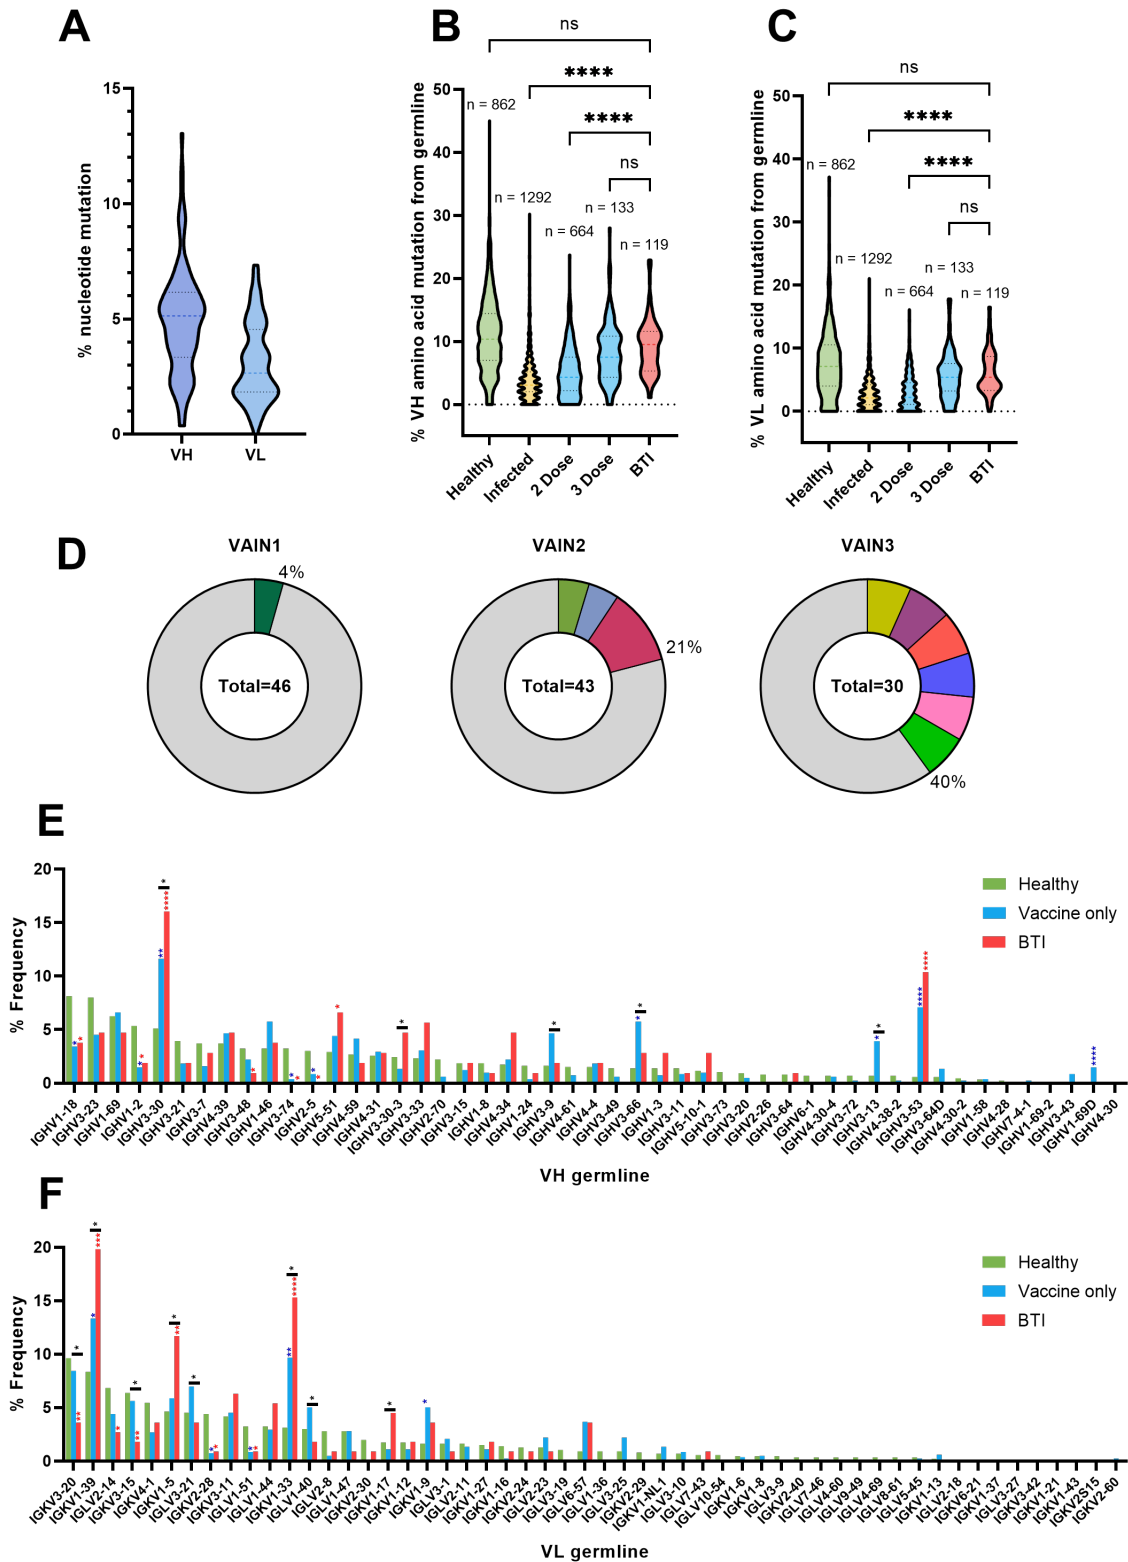

556

557 **Figure 2: BTI mAbs show higher somatic hypermutation than mAbs isolated following**  
558 **two vaccine doses. A)** Truncated violin plot showing the percentage of nucleotide mutation  
559 compared with germline for the VH and VL genes of Spike-reactive mAbs isolated from VAIN1,  
560 VAIN2 and VAIN3. Truncated violin plot comparing the percentage of amino acid mutation  
561 compared with germline for **B) VH** and **C) VL** between Spike-reactive mAbs isolated following  
562 infection, 2 doses of vaccine, 3 doses of vaccine or following BTI and IgG BCRs from SARS-  
563 CoV-2-naive individuals<sup>36</sup>. D'Agostino and Pearson tests were performed to determine  
564 normality. Based on the result, a Kruskal-Wallis test with Dunn's multiple comparison post hoc  
565 test was performed. \* $p < 0.0332$ , \*\* $p < 0.0021$ , \*\*\* $p < 0.0002$ , and \*\*\*\* $<0.0001$ . **D)** Pie chart  
566 showing distribution of heavy chain sequences for donors VAIN1, VAIN2 and VAIN3. The  
567 number inside the circle represent the number of heavy chains analysed. The Pie slice size is  
568 proportional to the number of clonally related sequences and are colour coded based in clonal  
569 expansions described in **Supplementary Table 2**. The % on the outside of the Pie slice  
570 represents the overall % of sequences related to a clonal expansion. Graph showing the  
571 relative abundance of **(E) V<sub>H</sub>** and **(F) V<sub>L</sub>** gene usage for Spike-reactive mAbs isolated following  
572 infection, 2 doses of vaccine, 3 doses of vaccine or following BTI and IgG BCRs from SARS-  
573 CoV-2-naive individuals<sup>36</sup>. Statistical significance was determined by binomial test. \*,  $P \leq 0.05$ ;  
574 \*\*,  $P \leq 0.01$ ; \*\*\*,  $P \leq 0.001$ ; \*\*\*\*,  $P \leq 0.0001$ . Blue stars are Vaccine vs Healthy, Red stars are  
575 BTI vs Healthy, Black are BTI vs Vaccine.

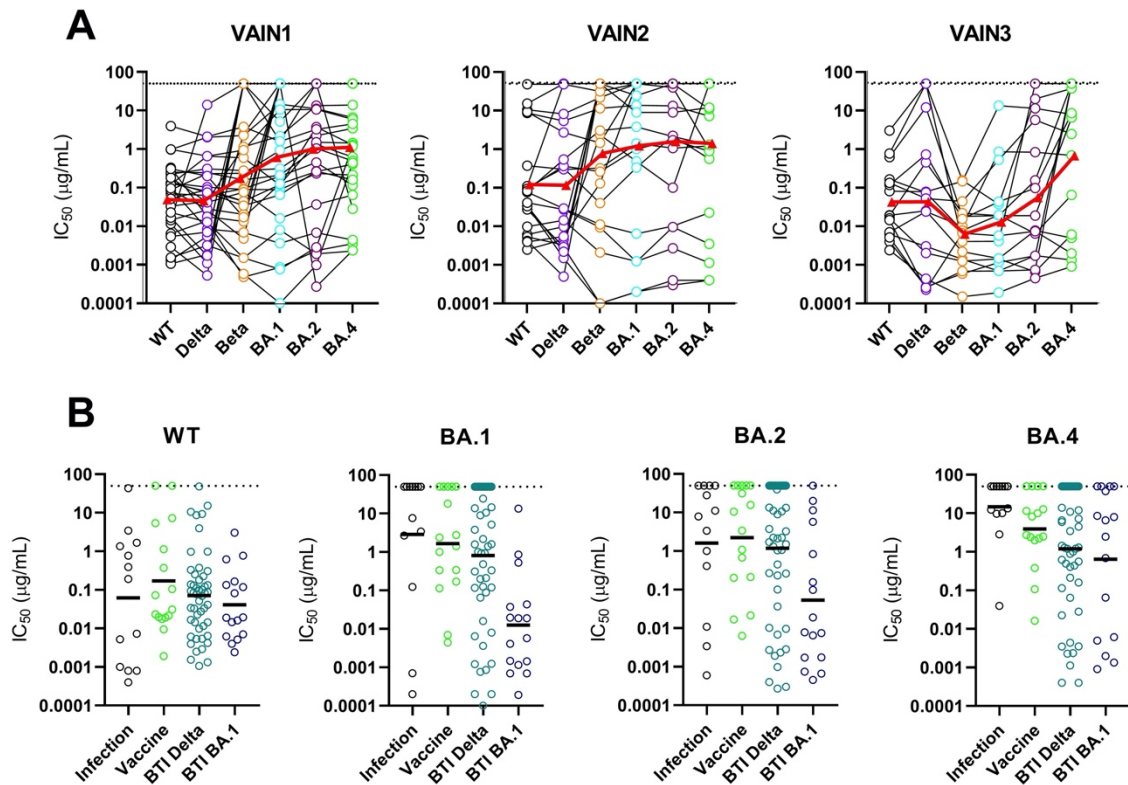

576

577 **Figure 3: Neutralization breadth and potency against omicron sub-lineages. A)**

578 Neutralization breadth and potency of BTI mAbs against Wuhan-1, delta, beta, BA.1, BA.2

579 and BA.4 from VAIN1, VAIN2 and VAIN3. Data for each mAb is linked. Red triangle and linking

580 line show the geometric mean IC<sub>50</sub> against each variant. Dotted line represents the highest

581 concentration of antibody tested. **B)** Comparison of neutralization breadth and potency of BTI

582 mAbs with mAbs isolated from convalescent donors (Infection)<sup>5</sup> and an AZD1222 vaccinated

583 donor<sup>6</sup> against omicron sub-lineages (BA.1, BA.2 and BA.4/5). Horizontal line represents the

584 geometric mean IC<sub>50</sub> against each mAb origin.



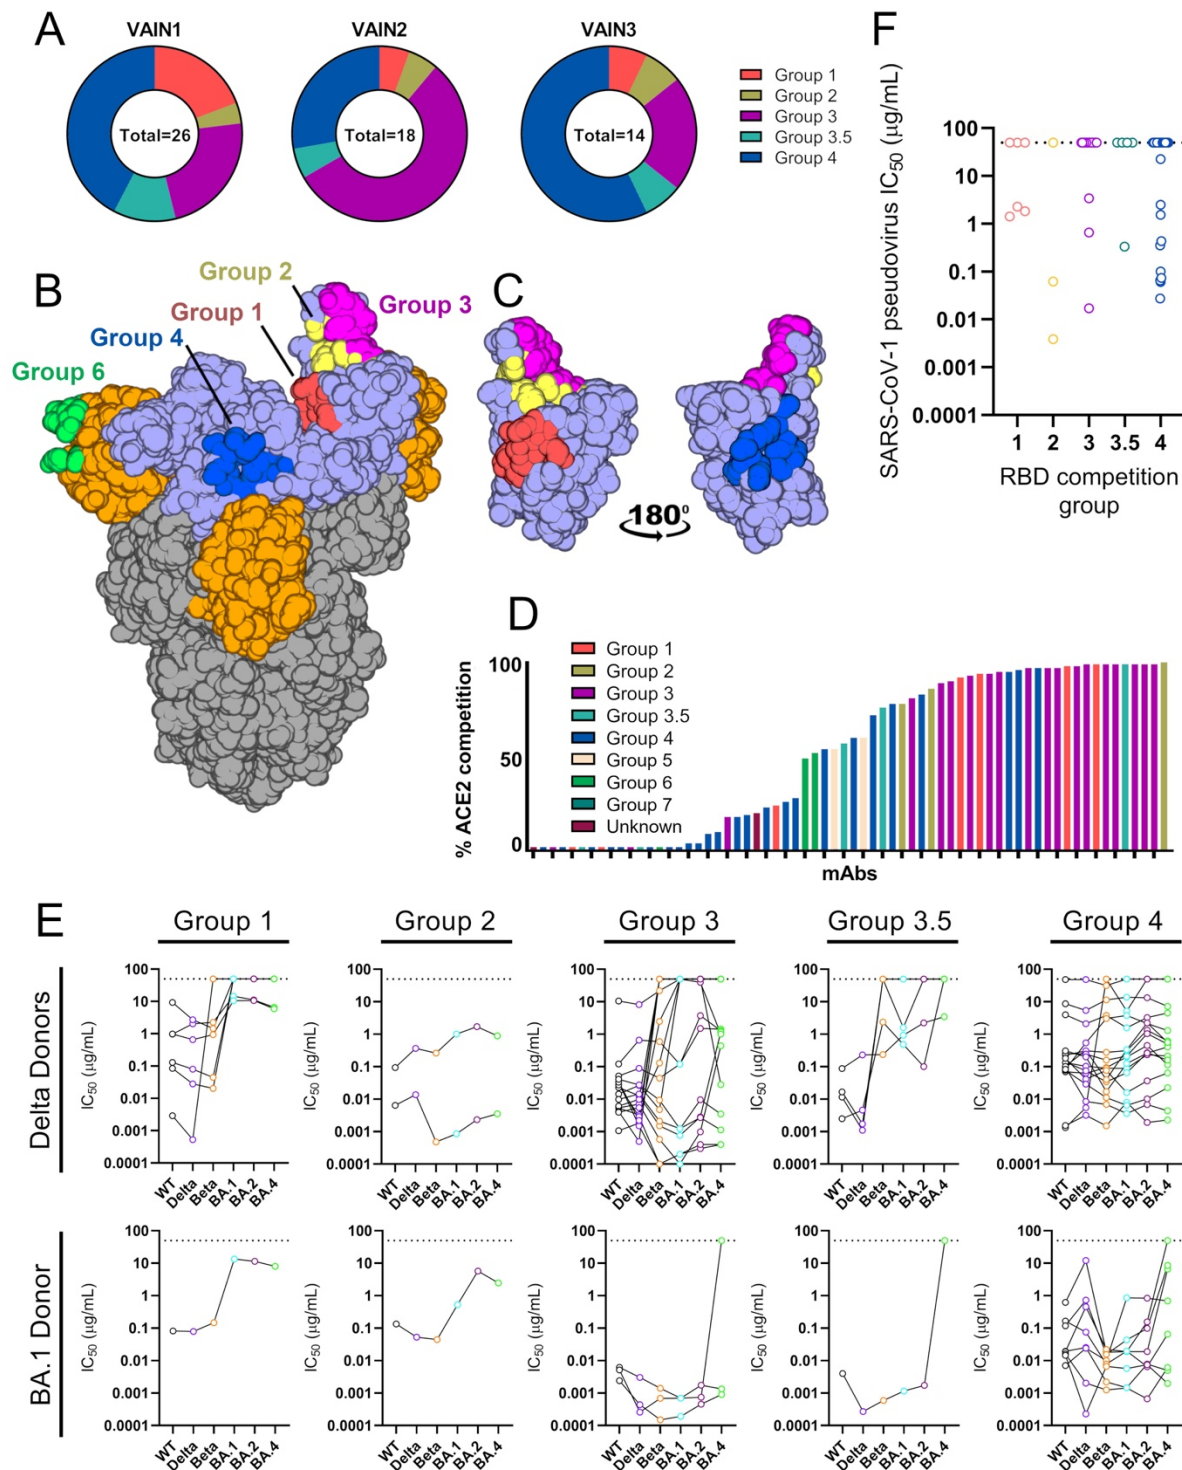

585

586 **Figure 4: RBD mAb characterisation. A)** Pie chart showing distribution of RBD-specific

587 mAbs between competition groups for VAIN1, VAIN2 and VAIN3. **B)** Surface representation

588 of SARS-CoV-2 WT spike (pdb:6XM0) showing epitopes of previously characterised

589 competition groups as coloured surfaces<sup>6</sup>. RBD and NTD are indicated by light blue and

590 orange, respectively. **C)** Surface representation of RBD domain in the up conformation

591 showing location and proximity of group 1 (red), group 2 (yellow), group 3 (magenta) and  
 592 group 4 (blue). Structures were generated in Pymol. **D)** Ability of RBD-specific neutralizing  
 593 antibodies to inhibit the interaction between cell surface ACE2 and soluble SARS-CoV-2  
 594 Spike. mAbs (at 600 nM) were pre-incubated with fluorescently labelled Spike before addition  
 595 to HeLa-ACE2 cells. The percentage reduction in mean fluorescence intensity is reported.  
 596 Experiments were performed in duplicate. Bars are colour coded based on their competition  
 597 group. **E)** Neutralization breadth and potency of RBD-specific mAbs within the different RBD  
 598 competition groups. mAbs are separated by the infecting VOC. Data for each mAb is linked.  
 599 Dotted line represents the highest concentration of antibody tested. **F)** Neutralization potency  
 600 of RBD-specific mAbs against SARS-CoV-1. Data is presented by RBD competition group.

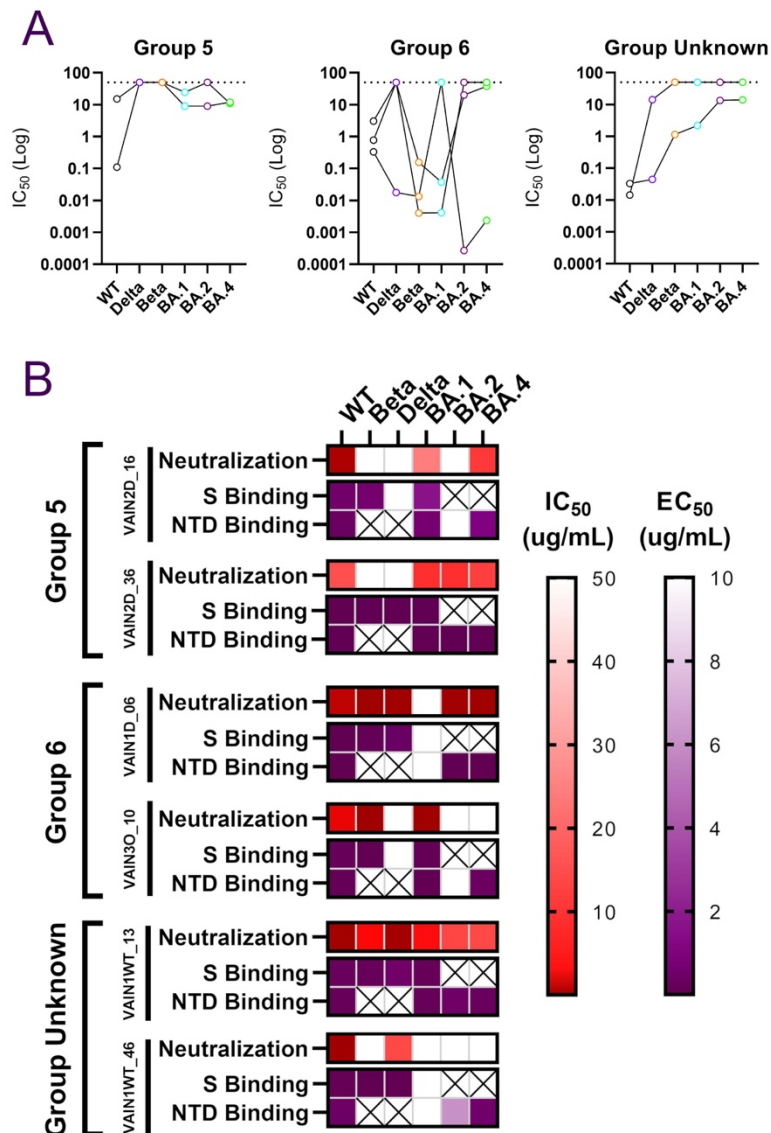

601

602 **Figure 5: NTD mAb characterisation. A)** Neutralization breadth and potency of NTD-specific  
 603 mAbs within the different NTD competition groups. Data for each mAb is linked. Dotted line  
 604 represents the highest concentration of antibody tested. **B)** Comparison between  
 605 neutralization activity ( $IC_{50}$ ) and binding to Spike or NTD ( $EC_{50}$ ) by ELISA for NTD-specific  
 606 mAbs.  $IC_{50}$  and  $EC_{50}$  values are shown as a heat map for each NTD-specific mAb with the  
 607 level of binding shown in the key. A cross indicates that the Spike or NTD antigen for that  
 608 variant was not tested.

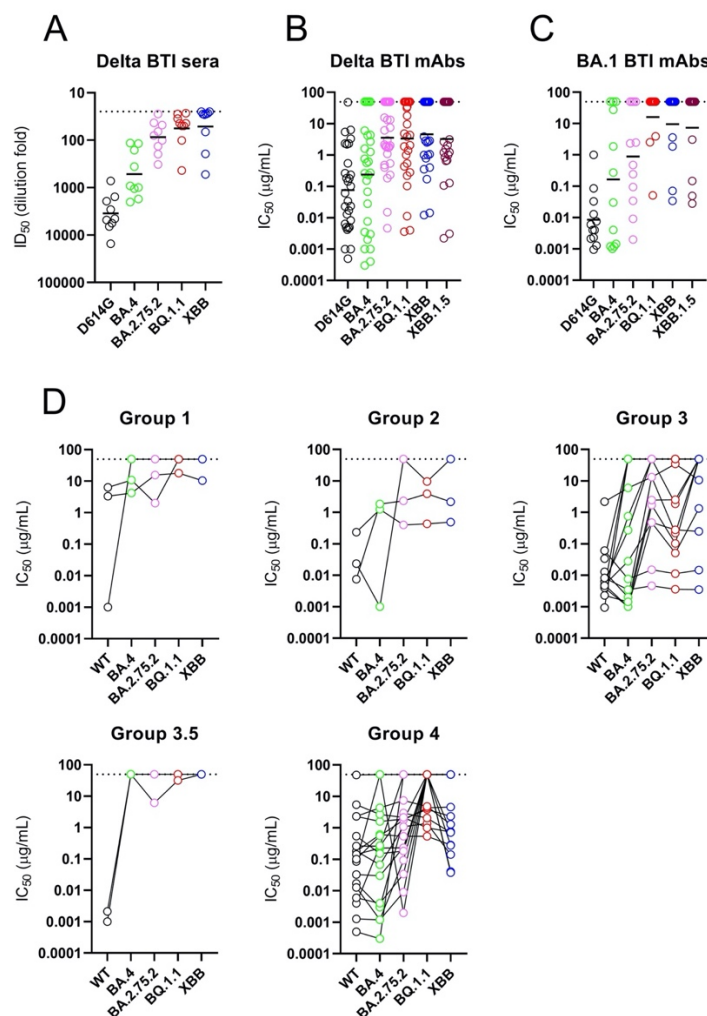

609  
 610 **Figure 6: mAb neutralization against more recent VOCs including BA.2.75.2,**  
 611 **XBB/XBB.1.5 and BQ.1.1.** Neutralization by **A)** plasma from individuals vaccinated with 2  
 612 doses of BNT162b2 and were subsequently delta-infected ( $ID_{50}$ ), **B)** mAbs from delta BTI  
 613 donors ( $IC_{50}$ ), and **C)** mAbs from BA.1 BTI donor ( $IC_{50}$ ). Sera was collected 15-35 days post

614 infection. Additional plasma samples from double vaccinated and BA.1 infected individuals  
615 were not available. Horizontal line represents geometric mean IC<sub>50</sub> (for mAbs) or geometric  
616 mean titres (plasma). **D**) Neutralization breadth and potency broken down by RBD competition  
617 group. Data for each mAb is linked. Dotted line represents the highest concentration of mAb  
618 or lowest dilution of plasma tested.

619

## 620 **References**

- 621 1 Goldblatt, D., Alter, G., Crotty, S. & Plotkin, S. A. Correlates of protection against  
622 SARS-CoV-2 infection and COVID-19 disease. *Immunol Rev* **310**, 6-26,  
623 doi:10.1111/imr.13091 (2022).
- 624 2 Addetia, A. *et al.* Neutralizing Antibodies Correlate with Protection from SARS-CoV-2  
625 in Humans during a Fishery Vessel Outbreak with a High Attack Rate. *J Clin Microbiol*  
626 **58**, e02107-02120, doi:10.1128/JCM.02107-20 (2020).
- 627 3 Khoury, D. S. *et al.* Neutralizing antibody levels are highly predictive of immune  
628 protection from symptomatic SARS-CoV-2 infection. *Nat Med* **27**, 1205-1211,  
629 doi:10.1038/s41591-021-01377-8 (2021).
- 630 4 Lustig, Y. *et al.* BNT162b2 COVID-19 vaccine and correlates of humoral immune  
631 responses and dynamics: a prospective, single-centre, longitudinal cohort study in  
632 health-care workers. *Lancet Respir Med* **9**, 999-1009, doi:10.1016/S2213-  
633 2600(21)00220-4 (2021).
- 634 5 Graham, C. *et al.* Neutralization potency of monoclonal antibodies recognizing  
635 dominant and subdominant epitopes on SARS-CoV-2 Spike is impacted by the B.1.1.7  
636 variant. *Immunity* **54**, 1276-1289, doi:10.1016/j.immuni.2021.03.023 (2021).
- 637 6 Seow, J. *et al.* ChAdOx1 nCoV-19 vaccine elicits monoclonal antibodies with cross-  
638 neutralizing activity against SARS-CoV-2 viral variants. *Cell Rep*, 110757,  
639 doi:10.1016/j.celrep.2022.110757 (2022).
- 640 7 Seow, J. *et al.* A neutralizing epitope on the SD1 domain of SARS-CoV-2 spike  
641 targeted following infection and vaccination. *Cell Rep* **40**, 111276,  
642 doi:10.1016/j.celrep.2022.111276 (2022).
- 643 8 Cho, A. *et al.* Anti-SARS-CoV-2 receptor-binding domain antibody evolution after  
644 mRNA vaccination. *Nature* **600**, 517-522, doi:10.1038/s41586-021-04060-7 (2021).
- 645 9 Wang, Z. *et al.* mRNA vaccine-elicited antibodies to SARS-CoV-2 and circulating  
646 variants. *Nature* **592**, 616-622, doi:10.1038/s41586-021-03324-6 (2021).
- 647 10 Wang, Z. *et al.* Memory B cell responses to Omicron subvariants after SARS-CoV-2  
648 mRNA breakthrough infection in humans. *J Exp Med* **219**, doi:10.1084/jem.20221006  
649 (2022).
- 650 11 Dejnirattisai, W. *et al.* The antigenic anatomy of SARS-CoV-2 receptor binding domain.  
651 *Cell* **184**, 2183-2200 e2122, doi:10.1016/j.cell.2021.02.032 (2021).
- 652 12 Piccoli, L. *et al.* Mapping Neutralizing and Immunodominant Sites on the SARS-CoV-  
653 2 Spike Receptor-Binding Domain by Structure-Guided High-Resolution Serology. *Cell*  
654 **183**, 1024-1042 e1021, doi:10.1016/j.cell.2020.09.037 (2020).
- 655 13 McCallum, M. *et al.* N-terminal domain antigenic mapping reveals a site of vulnerability  
656 for SARS-CoV-2. *Cell*, doi:10.1016/j.cell.2021.03.028 (2021).
- 657 14 Rogers, T. F. *et al.* Isolation of potent SARS-CoV-2 neutralizing antibodies and  
658 protection from disease in a small animal model. *Science* **369**, 956-963,  
659 doi:10.1126/science.abc7520 (2020).

- 660 15 Tortorici, M. A. *et al.* Ultrapotent human antibodies protect against SARS-CoV-2  
661 challenge via multiple mechanisms. *Science* **370**, 950-957,  
662 doi:10.1126/science.abe3354 (2020).
- 663 16 Goldberg, Y. *et al.* Waning Immunity after the BNT162b2 Vaccine in Israel. *N Engl J*  
664 *Med* **385**, e85, doi:10.1056/NEJMoa2114228 (2021).
- 665 17 Shrotri, M. *et al.* Spike-antibody waning after second dose of BNT162b2 or ChAdOx1.  
666 *Lancet* **398**, 385-387, doi:10.1016/S0140-6736(21)01642-1 (2021).
- 667 18 Carabelli, A. M. *et al.* SARS-CoV-2 variant biology: immune escape, transmission and  
668 fitness. *Nat Rev Microbiol* **21**, 162-177, doi:10.1038/s41579-022-00841-7 (2023).
- 669 19 Graham, C. *et al.* The effect of Omicron breakthrough infection and extended  
670 BNT162b2 booster dosing on neutralization breadth against SARS-CoV-2 variants of  
671 concern. *PLoS Pathog* **18**, e1010882, doi:10.1371/journal.ppat.1010882 (2022).
- 672 20 Lechmere, T. *et al.* Broad Neutralization of SARS-CoV-2 Variants, Including Omicron,  
673 following Breakthrough Infection with Delta in COVID-19-Vaccinated Individuals. *mBio*,  
674 e0379821, doi:10.1128/mbio.03798-21 (2022).
- 675 21 Walls, A. C. *et al.* SARS-CoV-2 breakthrough infections elicit potent, broad, and  
676 durable neutralizing antibody responses. *Cell* **185**, 872-880 e873,  
677 doi:10.1016/j.cell.2022.01.011 (2022).
- 678 22 Kaku, C. I. *et al.* Recall of pre-existing cross-reactive B cell memory following Omicron  
679 BA.1 breakthrough infection. *Sci Immunol*, eabq3511,  
680 doi:10.1126/sciimmunol.abq3511 (2022).
- 681 23 Cao, Y. L. *et al.* Imprinted SARS-CoV-2 humoral immunity induces convergent  
682 Omicron RBD evolution. *Nature*, doi:10.1038/s41586-022-05644-7 (2022).
- 683 24 Andrews, N. *et al.* Covid-19 Vaccine Effectiveness against the Omicron (B.1.1.529)  
684 Variant. *N Engl J Med* **386**, 1532-1546, doi:10.1056/NEJMoa2119451 (2022).
- 685 25 Madhi, S. A. *et al.* Efficacy of the ChAdOx1 nCoV-19 Covid-19 Vaccine against the  
686 B.1.351 Variant. *N Engl J Med*, doi:10.1056/NEJMoa2102214 (2021).
- 687 26 Yewdell, J. W. & Santos, J. J. S. Original Antigenic Sin: How Original? How Sinful?  
688 *Cold Spring Harb Perspect Med* **11**, doi:10.1101/cshperspect.a038786 (2021).
- 689 27 Angeletti, D. *et al.* Defining B cell immunodominance to viruses. *Nat Immunol* **18**, 456-  
690 463, doi:10.1038/ni.3680 (2017).
- 691 28 McCarthy, K. R. *et al.* Differential immune imprinting by influenza virus vaccination and  
692 infection in nonhuman primates. *Proc Natl Acad Sci U S A* **118**,  
693 doi:10.1073/pnas.2026752118 (2021).
- 694 29 Andreano, E. *et al.* B cell analyses after SARS-CoV-2 mRNA third vaccination reveals  
695 a hybrid immunity like antibody response. *Nat Commun* **14**, 53, doi:10.1038/s41467-  
696 022-35781-6 (2023).
- 697 30 Muecksch, F. *et al.* Increased Memory B Cell Potency and Breadth After a SARS-CoV-  
698 2 mRNA Boost. *Nature*, doi:10.1038/s41586-022-04778-y (2022).
- 699 31 Tiller, T. *et al.* Efficient generation of monoclonal antibodies from single human B cells  
700 by single cell RT-PCR and expression vector cloning. *J Immunol Methods* **329**, 112-  
701 124, doi:10.1016/j.jim.2007.09.017 (2008).
- 702 32 von Boehmer, L. *et al.* Sequencing and cloning of antigen-specific antibodies from  
703 mouse memory B cells. *Nat Protoc* **11**, 1908-1923, doi:10.1038/nprot.2016.102  
704 (2016).
- 705 33 Seow, J. *et al.* Longitudinal observation and decline of neutralizing antibody responses  
706 in the three months following SARS-CoV-2 infection in humans. *Nat Microbiol* **5**, 1598-  
707 1607, doi:10.1038/s41564-020-00813-8 (2020).
- 708 34 Lefranc, M. P. *et al.* IMGT, the international ImMunoGeneTics database. *Nucleic Acids*  
709 *Res* **27**, 209-212, doi:10.1093/nar/27.1.209 (1999).
- 710 35 Raybould, M. I. J., Kovaltsuk, A., Marks, C. & Deane, C. M. CoV-AbDab: the  
711 coronavirus antibody database. *Bioinformatics* **37**, 734-735,  
712 doi:10.1093/bioinformatics/btaa739 (2021).

- 713 36 Siu, J. H. Y. *et al.* Two subsets of human marginal zone B cells resolved by global  
714 analysis of lymphoid tissues and blood. *Sci Immunol* **7**, eabm9060,  
715 doi:10.1126/sciimmunol.abm9060 (2022).
- 716 37 Briney, B., Inderbitzin, A., Joyce, C. & Burton, D. R. Commonality despite exceptional  
717 diversity in the baseline human antibody repertoire. *Nature* **566**, 393-397,  
718 doi:10.1038/s41586-019-0879-y (2019).
- 719 38 *ARTICnetwork*, <<https://artic.network/ncov-2019>> (2021).
- 720 39 Barnes, C. O. *et al.* SARS-CoV-2 neutralizing antibody structures inform therapeutic  
721 strategies. *Nature* **588**, 682-687, doi:10.1038/s41586-020-2852-1 (2020).
- 722 40 Kim, S. I. *et al.* Stereotypic neutralizing VH antibodies against SARS-CoV-2 spike  
723 protein receptor binding domain in patients with COVID-19 and healthy individuals. *Sci*  
724 *Transl Med* **13**, doi:10.1126/scitranslmed.abd6990 (2021).
- 725 41 Robbiani, D. F. *et al.* Convergent antibody responses to SARS-CoV-2 in convalescent  
726 individuals. *Nature* **584**, 437-442, doi:10.1038/s41586-020-2456-9 (2020).
- 727 42 Gaebler, C. *et al.* Evolution of antibody immunity to SARS-CoV-2. *Nature* **591**, 639-  
728 644, doi:10.1038/s41586-021-03207-w (2021).
- 729 43 Muecksch, F. *et al.* Affinity maturation of SARS-CoV-2 neutralizing antibodies confers  
730 potency, breadth, and resilience to viral escape mutations. *Immunity* **54**, 1853-1868  
731 e1857, doi:10.1016/j.immuni.2021.07.008 (2021).
- 732 44 Goel, R. R. *et al.* Distinct antibody and memory B cell responses in SARS-CoV-2 naive  
733 and recovered individuals following mRNA vaccination. *Sci Immunol* **6**,  
734 doi:10.1126/sciimmunol.abi6950 (2021).
- 735 45 Ju, B. *et al.* Infection with wild-type SARS-CoV-2 elicits broadly neutralizing and  
736 protective antibodies against omicron subvariants. *Nat Immunol*, doi:10.1038/s41590-  
737 023-01449-6 (2023).
- 738 46 Rosa, A. *et al.* SARS-CoV-2 can recruit a haem metabolite to evade antibody immunity.  
739 *Sci Adv* **7**, eabg7607, doi:10.1126/sciadv.abg7607 (2021).
- 740 47 Wang, Z. J. *et al.* Analysis of memory B cells identifies conserved neutralizing epitopes  
741 on the N-terminal domain of variant SARS-Cov-2 spike proteins. *Immunity* **55**, 998-+,  
742 doi:10.1016/j.immuni.2022.04.003 (2022).
- 743 48 Cerutti, G. *et al.* Potent SARS-CoV-2 neutralizing antibodies directed against spike N-  
744 terminal domain target a single supersite. *Cell Host Microbe* **29**, 819-833 e817,  
745 doi:10.1016/j.chom.2021.03.005 (2021).
- 746 49 Beaudoin-Bussieres, G. *et al.* A Fc-enhanced NTD-binding non-neutralizing antibody  
747 delays virus spread and synergizes with a nAb to protect mice from lethal SARS-CoV-  
748 2 infection. *Cell Rep* **38**, 110368, doi:10.1016/j.celrep.2022.110368 (2022).
- 749 50 Kaplonek, P. *et al.* mRNA-1273 and BNT162b2 COVID-19 vaccines elicit antibodies  
750 with differences in Fc-mediated effector functions. *Sci Transl Med* **14**, eabm2311,  
751 doi:10.1126/scitranslmed.abm2311 (2022).
- 752 51 Khan, K. *et al.* Omicron infection enhances Delta antibody immunity in vaccinated  
753 persons. *Nature*, doi:10.1038/s41586-022-04830-x (2022).
- 754 52 Richardson, S. I. *et al.* SARS-CoV-2 Omicron triggers cross-reactive neutralization and  
755 Fc effector functions in previously vaccinated, but not unvaccinated, individuals. *Cell*  
756 *Host Microbe*, doi:10.1016/j.chom.2022.03.029 (2022).
- 757 53 Kaku, C. I. *et al.* Recall of preexisting cross-reactive B cell memory after Omicron BA.1  
758 breakthrough infection. *Science Immunology* **7**, doi:ARTN eabq3511  
759 10.1126/sciimmunol.abq3511 (2022).
- 760 54 Wang, Z. J. *et al.* Memory B cell responses to Omicron subvariants after SARS-CoV-  
761 2 mRNA breakthrough infection in humans. *Journal of Experimental Medicine* **219**,  
762 doi:ARTN e20221006  
763 10.1084/jem.20221006 (2022).
- 764 55 Nutalai, R. *et al.* Potent cross-reactive antibodies following Omicron breakthrough in  
765 vaccinees. *Cell* **185**, 2116-2131 e2118, doi:10.1016/j.cell.2022.05.014 (2022).
- 766 56 Goel, R. R. *et al.* Efficient recall of Omicron-reactive B cell memory after a third dose  
767 of SARS-CoV-2 mRNA vaccine. *Cell*, doi:10.1016/j.cell.2022.04.009 (2022).

- 768 57 Gruell, H. *et al.* mRNA booster immunization elicits potent neutralizing serum activity  
769 against the SARS-CoV-2 Omicron variant. *Nat Med* **28**, 477-480, doi:10.1038/s41591-  
770 021-01676-0 (2022).
- 771 58 Wang, K. *et al.* Memory B cell repertoire from triple vaccinees against diverse SARS-  
772 CoV-2 variants. *Nature* **603**, 919-925, doi:10.1038/s41586-022-04466-x (2022).
- 773 59 Collier, A. Y. *et al.* Immunogenicity of BA.5 Bivalent mRNA Vaccine Boosters. *N Engl*  
774 *J Med* **388**, 565-567, doi:10.1056/NEJMc2213948 (2023).
- 775 60 Wang, Q. *et al.* Antibody Response to Omicron BA.4-BA.5 Bivalent Booster. *N Engl J*  
776 *Med* **388**, 567-569, doi:10.1056/NEJMc2213907 (2023).
- 777 61 Lin, D. Y. *et al.* Effectiveness of Bivalent Boosters against Severe Omicron Infection.  
778 *N Engl J Med* **388**, 764-766, doi:10.1056/NEJMc2215471 (2023).
- 779 62 Wang, W. *et al.* Antigenic cartography of well-characterized human sera shows SARS-  
780 CoV-2 neutralization differences based on infection and vaccination history. *Cell Host*  
781 *Microbe* **30**, 1745-1758 e1747, doi:10.1016/j.chom.2022.10.012 (2022).
- 782 63 van der Straten, K. *et al.* Antigenic cartography using sera from sequence-confirmed  
783 SARS-CoV-2 variants of concern infections reveals antigenic divergence of Omicron.  
784 *Immunity* **55**, 1725-1731 e1724, doi:10.1016/j.immuni.2022.07.018 (2022).
- 785 64 Wang, Q. *et al.* Alarming antibody evasion properties of rising SARS-CoV-2 BQ and  
786 XBB subvariants. *Cell* **186**, 279-286 e278, doi:10.1016/j.cell.2022.12.018 (2023).
- 787 65 Imai, M. *et al.* Efficacy of Antiviral Agents against Omicron Subvariants BQ.1.1 and  
788 XBB. *N Engl J Med* **388**, 89-91, doi:10.1056/NEJMc2214302 (2023).
- 789 66 Uraki, R. *et al.* Humoral immune evasion of the omicron subvariants BQ.1.1 and XBB.  
790 *Lancet Infect Dis* **23**, 30-32, doi:10.1016/S1473-3099(22)00816-7 (2023).
- 791 67 Miller, J. *et al.* Substantial Neutralization Escape by SARS-CoV-2 Omicron Variants  
792 BQ.1.1 and XBB.1. *N Engl J Med* **388**, 662-664, doi:10.1056/NEJMc2214314 (2023).
- 793 68 Chakraborty, C., Bhattacharya, M. & Dhama, K. Cases of BA.2.75 and recent  
794 BA.2.75.2 subvariant of Omicron are increasing in India: Is it alarming at the global  
795 level? *Ann Med Surg (Lond)* **84**, 104963, doi:10.1016/j.amsu.2022.104963 (2022).
- 796 69 Scheid, J. F. *et al.* Broad diversity of neutralizing antibodies isolated from memory B  
797 cells in HIV-infected individuals. *Nature* **458**, 636-640, doi:10.1038/nature07930  
798 (2009).
- 799 70 Zufferey, R., Nagy, D., Mandel, R. J., Naldini, L. & Trono, D. Multiply attenuated  
800 lentiviral vector achieves efficient gene delivery in vivo. *Nat Biotechnol* **15**, 871-875,  
801 doi:10.1038/nbt0997-871 (1997).  
802
